# Supplementary material
Source: PubMed Central journal article supplement (PMC3946913)
Supplement: NIHMS543574-supplement-1.pdf [file NIHMS543574-supplement-1.pdf]

# Supplementary Table 1. Alignment of SIV Env Sequences.

|                    |                                                                                                                                 |     |
|--------------------|---------------------------------------------------------------------------------------------------------------------------------|-----|
| T/F_consensus      | MGCLGNQLLIALLLVSALEIYCYQYVTVFYGVPAWKNAIPLFCITRNDRDWTGTTQCLPDNDYSELAI <sup>5</sup> TEAFDAWNNTVTEQAIEDVWNLFFETSISK                | 100 |
| DNA_gp145          | .....I..L.VYG..TL.....R.....A..K.....G...V.LNV...S.....Q.....                                                                   | 100 |
| rAd5_gp140         | .....I..L.VYG..TL.....R.....A..K.....G...V.LNV...S.....Q.....                                                                   | 100 |
| DNA_mosaic1        | .....I..L.VYG..TL.....R.....A..K.....G...V.LNV...S.....Q.....                                                                   | 100 |
| DNA_mosaic2        | ..W.....L...G.....T.....A..Q.....V.....G.....NV..R.....Q.....                                                                   | 100 |
| E660_CP3C.FJ578816 | .....L.....L.....A..K.....V.....G.....NV..R.....Q.....                                                                          | 100 |
| E660_CR54.FJ578939 | .....L.....L.....A..K.....V.....G.....NV..R.....Q.....                                                                          | 100 |
| SME543_U72748      | .....V...C.....A..K.....V.....G.....NV..R.....Q.....                                                                            | 100 |
|                    | <span style="color: red;">-----V1_loop-----</span> <span style="color: blue;">-----V2_loop--&gt;</span>                         |     |
| T/F_consensus      | CVKLTPLCIAMRCKNETDRWGLT-R-NAGTTTTTTT-TTAAT-P5-VAENVINESNPCKNNSCAGLEQEPMIGCKFNMTGLKRDKRIEYNETWYSRD                               | 195 |
| DNA_gp145          | .....S...T...S.....-K-SIT..A-S-----ST..-A.AK-VDMV..TSS..AQDN.T...Q..S.....KK.....A.                                             | 191 |
| rAd5_gp140         | .....S...T...S.....-K-SIT..A-S-----ST..-A.AK-VDMV..TSS..AQDN.T...Q..S.....KK.....A.                                             | 191 |
| DNA_mosaic1        | .....S...T...S.....-K-SIT..A-S-----ST..-A.AK-VDMV..TSS..AQDN.T...Q..S.....KK.....A.                                             | 192 |
| DNA_mosaic2        | .....T.K.....-A.T..S-SP-S-PTTAS..-G.E.V.DTMS.T..N.S.I.....Q.....K.....T.                                                        | 193 |
| E660_CP3C.FJ578816 | .....T.K.....-A.T..S-SP-S-PTTAS..-G.E.V.DTMS.T..N.S.I.....Q.....K.....T.                                                        | 194 |
| E660_CR54.FJ578939 | .....T.K.....-A.T..S-SP-S-PTTAS..-G.E.V.DTMS.T..N.S.I.....Q.....K.....T.                                                        | 195 |
| SME543_U72748      | .....G.AETT..AKS..S..-T..-TT..TPK.....GDS.....K.....                                                                            | 195 |
|                    | <span style="color: blue;">&lt;-----V2_loop</span>                                                                              |     |
| T/F_consensus      | LICEQ--S-A-NESESKYMHHCNTSVIEQSCDKHYWDAIRFRYCAPPGYALLRCNDSNYSGFAPNCSKVVSSCTRMMETQTSTWFGFNGTRAENRTYI                              | 291 |
| DNA_gp145          | ..V...--GNN-TGN..R..N.....T.....M.K.....                                                                                        | 288 |
| rAd5_gp140         | ..V...--GNN-TGN..R..N.....T.....M.K.....                                                                                        | 288 |
| DNA_mosaic1        | ..V...--GNN-TGN..R..N.....T.....M.K.....                                                                                        | 292 |
| DNA_mosaic2        | ..V...-N..NG..TD..N.....R.....Y.....M.....                                                                                      | 291 |
| E660_CP3C.FJ578816 | ..V...-N..NG..TD..N.....R.....Y.....M.....                                                                                      | 290 |
| E660_CR54.FJ578939 | ..V...-N..NG..TD..N.....R.....Y.....M.....                                                                                      | 291 |
| SME543_U72748      | ..V...-N..NG..TD..N.....R.....Y.....M.....                                                                                      | 291 |
|                    | <span style="color: green;">-----V3_loop-----</span>                                                                            |     |
| T/F_consensus      | YWHGKSNRTIISLNKYNYLTMRCRRPGNKITVLPVTIMSGLVFHSQPINERPKQAWCFGGSWKEAIQEVKETLVKHPRYTG--NDTKKINLTAPA--GGDP                           | 389 |
| DNA_gp145          | .....RD.....K.....D.....K..D..K..Q..I.....-N..D.....G.....                                                                      | 386 |
| rAd5_gp140         | .....RD.....K.....D.....K..D..K..Q..I.....-N..D.....G.....                                                                      | 386 |
| DNA_mosaic1        | .....RD.....I.....R.....K.....Q.....I.....K..G.....R.....F..E..GRKS..                                                           | 390 |
| DNA_mosaic2        | .....RD.....I.....R.....K.....Q.....I.....K..G.....R.....F..E..GRKS..                                                           | 391 |
| E660_CP3C.FJ578816 | .....RD.....I.....R.....K.....Q.....I.....K..G.....R.....F..E..GRKS..                                                           | 388 |
| E660_CR54.FJ578939 | .....RD.....I.....R.....K.....Q.....I.....K..G.....R.....F..E..GRKS..                                                           | 389 |
| SME543_U72748      | .....N.....K.....R.....N..S.....R.....                                                                                          | 389 |
|                    | <span style="color: purple;">-----V4_loop-----</span> <span style="color: magenta;">-----V5_loop-----</span>                    |     |
| T/F_consensus      | EVTFMWTCNCRGEFLYCKMNNWFLNWDVEDRQKSRWRQNTKERQKKNYVPCHIRQIINTWHKVGKNVYLPREGDLTCNSTVTSLIAEIDWNTNNETNIT                             | 489 |
| DNA_gp145          | .....NTAN-----KP..QH.R.....N...IDG.Q...                                                                                         | 481 |
| rAd5_gp140         | .....NTAN-----KP..QH.R.....N...IDG.Q...                                                                                         | 481 |
| DNA_mosaic1        | .....NTS..P..TT..TK..QH.R.....N...IDG.Q...                                                                                      | 490 |
| DNA_mosaic2        | .....A.....T.....NET..L..LK..P..K.R.....V.....R.....S..N..E.....YDK.Q...                                                        | 491 |
| E660_CP3C.FJ578816 | .....A.....T.....NET..L..LK..P..K.R.....V.....R.....S..N..E.....YDK.Q...                                                        | 488 |
| E660_CR54.FJ578939 | .....A.....T.....NET..L..LK..P..K.R.....V.....R.....S..N..E.....YDK.Q...                                                        | 489 |
| SME543_U72748      | .....N..N..K..KPK.Q..R.....I.....                                                                                               | 489 |
|                    | <span style="color: green;">gp120 ↔ gp141</span>                                                                                |     |
| T/F_consensus      | MSAEVAELRYRLELGDYKLVETIPGLAPTSVRRYTTTGASRNKRGVFLGFLGFLATAGSANGAASLTLSAQSRLLAGIVQQQQLLDVVVKRQQLLRL                               | 589 |
| DNA_gp145          | .....D.K.....T.....                                                                                                             | 549 |
| rAd5_gp140         | .....D.K.....T.....                                                                                                             | 549 |
| DNA_mosaic1        | .....K.....S.....T.....                                                                                                         | 590 |
| DNA_mosaic2        | .....G.....M.....K.....S-T.K.....T.....                                                                                         | 590 |
| E660_CP3C.FJ578816 | .....G.....M.....K.....S-T.K.....T.....                                                                                         | 588 |
| E660_CR54.FJ578939 | .....G.....M.....K.....S-T.K.....T.....                                                                                         | 589 |
| SME543_U72748      | .....D.....H.....                                                                                                               | 589 |
|                    | <span style="color: orange;">-----MPER--&gt;</span>                                                                             |     |
| T/F_consensus      | TVWGKTNLQTRVTAIEKYLKDQAKLNSWGAFCFRQVCHTTVPWPNETLVPNWSNMTWQEWERQVDFLEANITQLLEEAQIQEK <sup>5</sup> NHYELQKLN <sup>5</sup> WDIFGNW | 689 |
| DNA_gp145          | .....-AS..T.K.N.E.....K.....E.....A.....V.....                                                                                  | 631 |
| rAd5_gp140         | .....-AS..T.K.N.E.....K.....E.....A.....V.....                                                                                  | 631 |
| DNA_mosaic1        | .....D..I..D..N.....K.....L.....V.....                                                                                          | 690 |
| DNA_mosaic2        | A.....A.....R.....Q.....DS.....D..N.....AM.....L.....                                                                           | 690 |
| E660_CP3C.FJ578816 | .....D.....DS.....D..N.....AM.....L.....                                                                                        | 688 |
| E660_CR54.FJ578939 | .....D.....DS.....D..N.....AM.....L.....                                                                                        | 689 |
| SME543_U72748      | .....DS.....D..N.....AM.....L.....                                                                                              | 689 |
|                    | <span style="color: blue;">-----TM-----</span>                                                                                  |     |
| T/F_consensus      | FDLTSWIRYIQYGLVILVGVGLRIVIVVQMLARLQRYRPFVFSPPAYVQIPIHKGQEPPTKEGEGEGDRGNRSWPQIEYIHFILRQLRLLT                                     | 789 |
| DNA_gp145          | .....A...K.....Y...V..IL.....I.....                                                                                             | 664 |
| rAd5_gp140         | .....A...K.....Y...V..IL.....I.....                                                                                             | 642 |
| DNA_mosaic1        | .....K.....I.....K.....D.....                                                                                                   | 790 |
| DNA_mosaic2        | .....K.....YL..V..IIL.....P..T..I.....L..G.....S..Y.....L..L..V.....                                                            | 790 |
| E660_CP3C.FJ578816 | .....K.....YL..V..IIL.....P..T..I.....L..G.....S..Y.....L..L..V.....                                                            | 788 |
| E660_CR54.FJ578939 | .....K.....YL..V..IIL.....P..T..I.....L..G.....S..Y.....L..L..V.....                                                            | 789 |
| SME543_U72748      | .....P.....D.....S.....                                                                                                         | 789 |
|                    | <span style="color: blue;">-----TM-----</span>                                                                                  |     |
| T/F_consensus      | WLFSSCRDWLLRIYQVLQVLPVLSLSTTSQRVREYIRIGIAYLQYGWRYFQEAQAWKFARETLASAWRDIWETLGRVGRGILAIIPRRVRQGLELTL                               | 887 |
| DNA_gp145          | .....NN..TC.....I.....F..R..FAAL...Q...TE.....C..W.....A..RA.....L.....I.....                                                   | 664 |
| rAd5_gp140         | .....NN..TC.....I.....F..R..FAAL...Q...TE.....C..W.....A..RA.....L.....I.....                                                   | 642 |
| DNA_mosaic1        | .....N...T...C..S...F..R..E..V..I...LEVT...SW..K...A..RS..G...G..GDYL..S..R...G...I...F...M...                                  | 888 |
| DNA_mosaic2        | .....N...T...C..S...F..R..E..V..I...LEVT...SW..K...A..RS..G...G..GDYL..S..R...G...I...F...M...                                  | 888 |
| E660_CP3C.FJ578816 | .....N...T...C..S...F..R..E..V..I...LEVT...SW..K...A..RS..G...G..GDYL..S..R...G...I...F...M...                                  | 886 |
| E660_CR54.FJ578939 | .....N...T...C..S...F..R..E..V..I...LEVT...SW..K...A..RS..G...G..GDYL..S..R...G...I...F...M...                                  | 887 |
| SME543_U72748      | .....I.....R..L...E..T...S...A.....A.....                                                                                       | 887 |

**Notes.** An amino acid alignment of sequences relevant to this manuscript, compared to the consensus of the transmitted/founder viruses. Comparisons are made to: (1) the DNA gp145 mac239 Env immunogen; (2) the rAd5 gp140 mac239 Env immunogen; (3, 4) the two gp160 Env mosaics, identical for both DNA and rAd5 immunogens; (5, 6) the sequences of the E660 clones, CP3C and CR54; and (7) the sequence of smE543, used for synthesizing overlapping peptides for T cell and B cell assays. Highlights: amino acids 23, 45, 47, and 70 in cyan; peptide 119+120 in yellow; and the approximate bounds of the five variable loops, the membrane-proximal extracellular region (MPER), and the transmembrane domain (TM). See also Supplementary Table 2.

**Supplementary Table 2. Amino-acid distances between Env from vaccines, transmitted/founder sequences, and peptides used for immunological response testing**

|                           | <b>1</b> | <b>2</b> | <b>3</b> | <b>4</b> | <b>5</b> | <b>6</b> | <b>7</b> | <b>8</b> |
|---------------------------|----------|----------|----------|----------|----------|----------|----------|----------|
| <b>1 T/F_consensus</b>    |          | 15.7%    | 15.5%    | 11.4%    | 16.1%    | 0.9%     | 1.2%     | 6.8%     |
| <b>2 DNA_gp145</b>        | 104      |          | 0.0%     | 10.0%    | 15.6%    | 15.3%    | 15.4%    | 13.8%    |
| <b>3 rAd5_gp140</b>       | 99       | 0        |          | 10.0%    | 15.6%    | 15.3%    | 15.4%    | 13.8%    |
| <b>4 DNA_mosaic1</b>      | 101      | 66       | 62       |          | 16.4%    | 11.3%    | 11.1%    | 11.9%    |
| <b>5 DNA_mosaic2</b>      | 142      | 103      | 100      | 145      |          | 16.0%    | 15.9%    | 16.9%    |
| <b>6 E660.CP3C.FJ5788</b> | 8        | 101      | 96       | 100      | 141      |          | 1.5%     | 6.6%     |
| <b>7 E660.CR54.FJ5789</b> | 11       | 102      | 97       | 98       | 140      | 13       |          | 6.8%     |
| <b>8 SME543.U72748</b>    | 60       | 91       | 86       | 105      | 149      | 58       | 60       |          |

Notes: Values below the diagonal show total number of amino acid differences between each pair of sequences. Values above the diagonals (percentages) show the fractional differences, adjusted for sequence length and missing data; matching amino acid gaps are not counted.

# Supplementary Table 3. Transmitted/Founder (T/F) variants in Env. Variable Amino Acid in Envelope

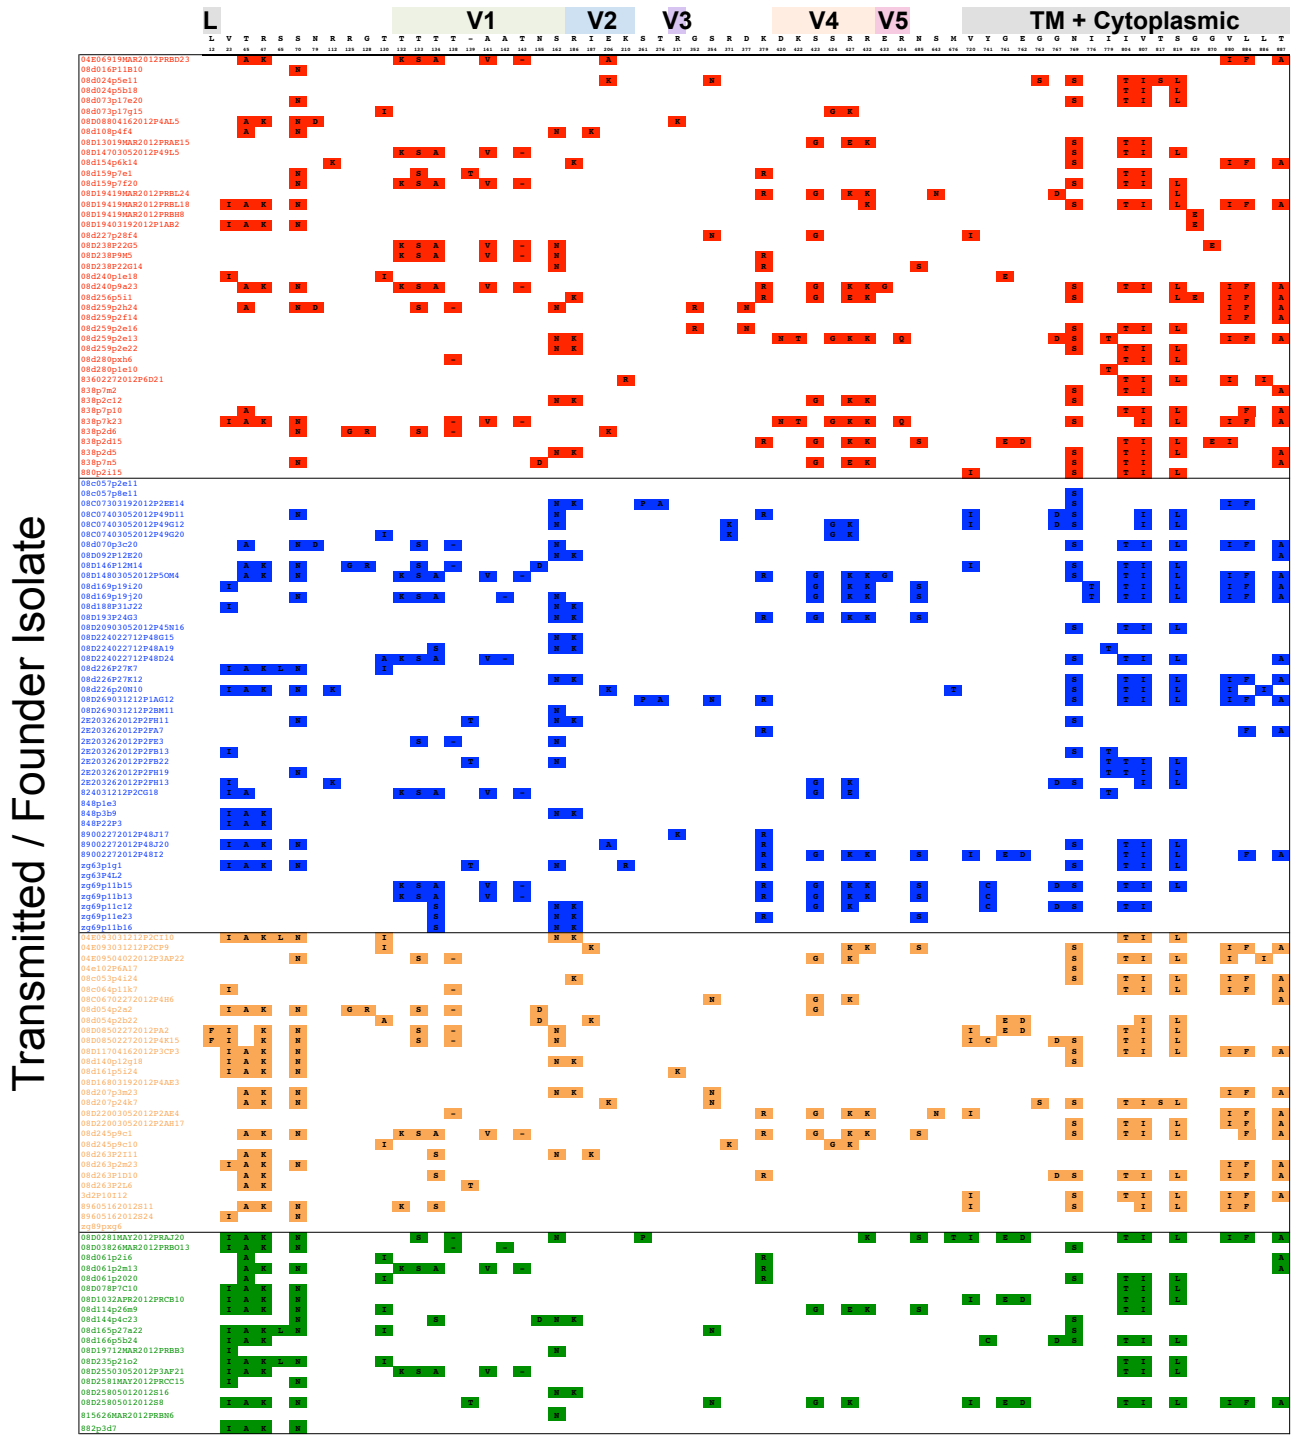

Transmitted / Founder Isolate

**Notes.** A total of 63 amino acid positions in SIV Env showed heterogeneity among T/F viruses. All variants are graphically depicted; white space indicates consensus to the E660 challenge swarm. Color coding indicates immunization arm (red: control; blue: Gag; orange: mosaic Env; green: mac239 Env).



**Supplementary Table 5. SIV Env peptides targeted by antisera in animals showing greater protection from acquisition.**

| Peptides | Region | Position | Sequence (smE543)                     |
|----------|--------|----------|---------------------------------------|
| 12-13    | C1     | 34       | <u>AWKNATIPLFCATKNRDT</u>             |
| 73       | C2     | 215      | <u>VIQESCDKHYWDAIR</u>                |
| 119-120  | C3     | 353      | <u>AIQEVKETLVKHPRYTGT</u>             |
| 146-151  | V5     | 441      | <u>WHKVGKNVYLPPREGDLTCNSTVTSLIAEI</u> |

**Notes.** The sequences of the peptides within the four regions shown in Fig 4g. Blue lines indicate the individual overlapping 15mer peptides assayed within each region.
